# Supplementary material for: Synthesis of MnO@C core–shell nanoplates with controllable shell thickness and their electrochemical performance for lithium-ion batteries
Source: Royal Society of Chemistry journal article supplement (doi:10.1039/c2jm32421k), 2012-01-01
Supplement: c2jm32421k.pdf [file c2jm32421k.pdf]

## Support Information

### Synthesis MnO@C core-shell nanoplates with controllable shell thickness and their electrochemical performance for lithium-ion batteries

Xing Zhang,<sup>a</sup> Zheng Xing,<sup>a</sup> Lili Wang,<sup>a</sup> Yongchun Zhu,<sup>\*a</sup> Qianwen Li,<sup>a</sup> Jianwen Liang,<sup>a</sup> Yang Yu,<sup>a</sup> Tao Huang,<sup>a</sup> Kaibin Tang,<sup>a</sup> Yitai Qian<sup>\*a, b</sup> and Xiaoyan Shen<sup>c</sup>

<sup>a</sup> Hefei National Laboratory for Physical Sciences at Microscale and Department of Chemistry, University of Science and Technology of China, Hefei, Anhui, 230026, P. R. China. Fax: +86-551-360-7402; Tel: +86-551-360-1589; E-mail: ytqian@ustc.edu.cn

<sup>b</sup> School of Chemistry and Chemical Engineering, Shandong University, Jinan, 250100, P. R. China.

<sup>c</sup> Jiangsu Highstar Battery Manufacturing CO., LTD.

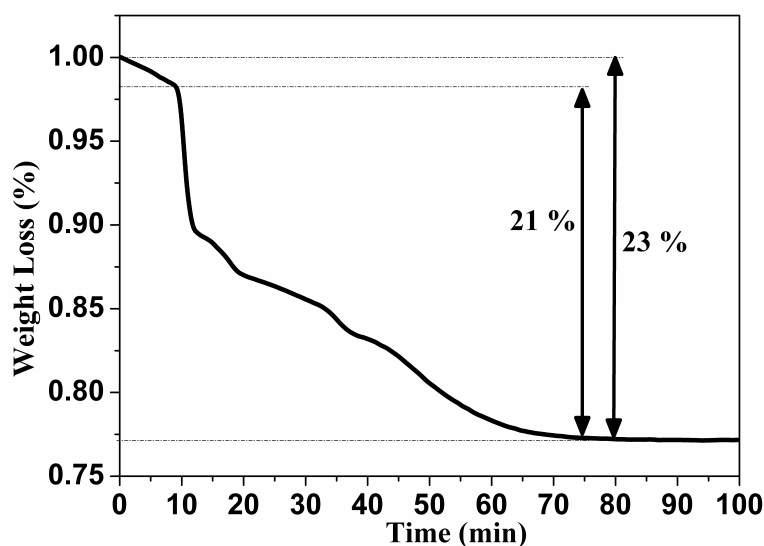

Fig. 1 The TGA curve of the precursor Mn(OH)<sub>2</sub> plates under the hydrogen condition.

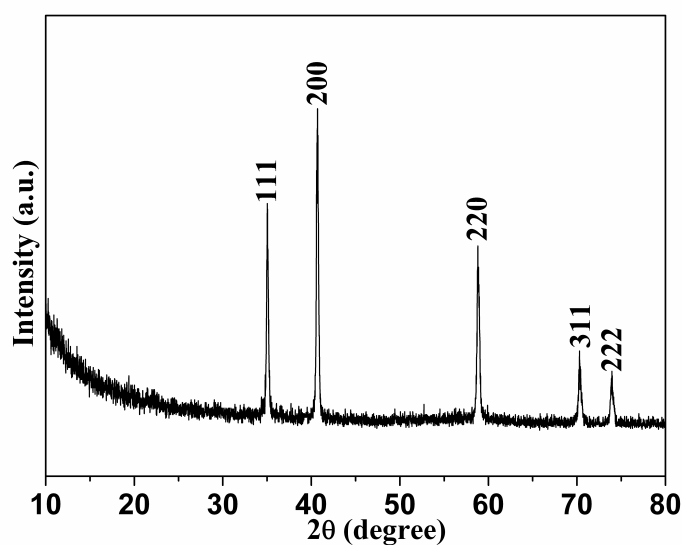

Fig. 2 The XRD pattern of the product after testing the TGA.

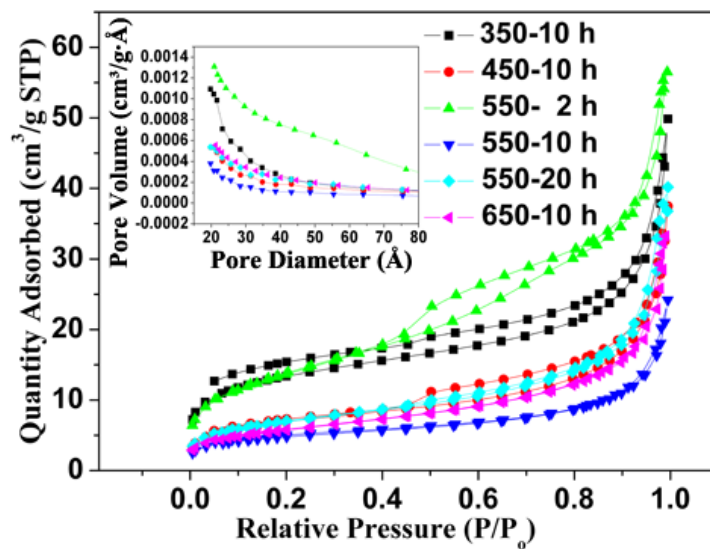

Fig. 3 N<sub>2</sub> adsorption–desorption isotherms and pore diameter distributions curves (inset) of MnO@C samples produced by calcining the precursory Mn(OH)<sub>2</sub> nanoplates in acetylene at different conditions.
